# Supplementary material for: Klebsiella pneumoniae Volatile Organic Compounds (VOCs) Protect Artemia salina from Fish Pathogen Aeromonas sp.: A Combined In Vitro, In Vivo, and In Silico Approach
Source: MDPI journal article supplement (doi:10.3390/microorganisms11010172), 2023-01-10
Supplement: s1 [file s1]

# ***Klebsiella pneumoniae* Volatile Organic Compounds (VOCs) Protect *Artemia salina* from Fish Pathogen *Aeromonas* sp.: A combined *In vitro*, *In vivo*, and *In silico* approach**

Md. Liton Mahmud<sup>1, #</sup>, Shirmin Islam<sup>1, #</sup>, Suvro Biswas<sup>1</sup>, Md. Golam Mortuza<sup>2</sup>, Gobindo Kumar Paul<sup>1,3</sup>, Md. Salah Uddin<sup>1</sup>, Md. Akhtar-E-Ekram<sup>1</sup>, Md. Abu Saleh<sup>1, \*</sup> and Shahriar Zaman<sup>1, \*</sup>, Asad Syed<sup>4</sup>, Abdallah M.Elgorban<sup>4</sup>, Nouf S. S. Zaghloul<sup>5</sup>

<sup>1</sup>Microbiology Laboratory, Department of Genetic Engineering and Biotechnology, University of Rajshahi, Rajshahi-6205, Bangladesh

<sup>2</sup>Department of Science and Humanities, Bangladesh Army International University of Science and Technology, Cumilla-3500, Bangladesh

<sup>3</sup>Bangladesh Reference Institute for Chemical Measurements (BRiCM), Bangladesh Council of Scientific and Industrial Research (BCSIR), Dhaka, Bangladesh

<sup>4</sup>Department of Botany and Microbiology, College of Science, King Saud University, P.O. 2455, Riyadh, 11451, Saudi Arabia

<sup>5</sup>Bristol Centre for Functional Nanomaterials, HH Wills Physics Laboratory, Tyndall Avenue, University of Bristol, Bristol, BS8 1FD, UK.

# Indicates equal contribution

\* Correspondence: to: saleh@ru.ac.bd; szaman@ru.ac.bd

**Table S1:** List of bacterial strains used for antagonistic test.

| Sl. no. | Name of the used bacterial strains |
|---------|------------------------------------|
| 01      | <i>Staphylococcus aureus</i>       |
| 02      | <i>Lactobacillus</i> sp.           |
| 03      | <i>Bacillus thuringiensis</i>      |
| 04      | <i>Klebsiella pneumoniae</i>       |
| 05      | <i>Pseudomonas</i> sp.             |
| 06      | <i>Escherichia coli</i>            |

**Table S2: Volatile compounds (with PubChem ID, molecular weight and binding affinity) produced by *Klebsiella Pneumoniae*. Data were obtained from GC-MS analysis**

|     | Compound Names                            | PubChem ID | Molecular Weight (g/mol) | Binding Affinity |
|-----|-------------------------------------------|------------|--------------------------|------------------|
| L-1 | Butanoic acid, methyl ester               | 12180      | 102.13                   | -4.5             |
| L-2 | 1-Butanol, 3-methyl-                      | 31260      | 88.15                    | -4.5             |
| L-3 | Disulfide, dimethyl                       | 12232      | 94.2                     | -2.4             |
| L-4 | 2,2-Dichloroethanol, acetate              | 527751     | 156.99                   | -4.6             |
| L-5 | Butanoic acid                             | 264        | 88.11                    | -4.6             |
| L-6 | Butanoic acid, 3-methyl-                  | 10430      | 102.13                   | -4.4             |
| L-7 | Butanoic acid, 2-methyl-                  | 8314       | 102.13                   | -4.9             |
| L-8 | Oxime-, methoxy-phenyl-                   | 9602988    | 151.16                   | -6.7             |
| L-9 | 2-Hydroxymethyl-6-methoxytetrahydropyran- | 360938     | 162.18                   | -4.9             |

|             |                                                       |         |        |      |
|-------------|-------------------------------------------------------|---------|--------|------|
|             | 3-ol                                                  |         |        |      |
| <b>L-10</b> | Oxime-, methoxy-phenyl-_                              | 9602988 | 151.16 | -6.7 |
| <b>L-11</b> | Disulfide, fluoromethyl methyl                        | 574430  | 112.19 | -2.7 |
| <b>L-12</b> | Anisole                                               | 7519    | 108.14 | -5.3 |
| <b>L-13</b> | 4',6'-Dimethoxy-2',3'-dimethylacetophenone            | 606430  | 208.25 | -5.3 |
| <b>L-14</b> | Butanoic acid, 2-methylpropyl ester                   | 10885   | 144.21 | -4.8 |
| <b>L-15</b> | Dimethyl trisulfide                                   | 19310   | 126.3  | -2.3 |
| <b>L-16</b> | Pentasulfide, dimethyl                                | 81772   | 190.4  | -2.4 |
| <b>L-17</b> | 2,4-Dichloro-6-[(3-hydroxyphenylimino)methyl]phenol   | 548611  | 282.12 | -6.1 |
| <b>L-18</b> | Phenol, 2-chloro-                                     | 7245    | 128.55 | -5.7 |
| <b>L-19</b> | Butanoic acid, butyl ester                            | 7983    | 144.21 | -4.2 |
| <b>L-20</b> | Pyrazine, trimethyl-                                  | 26808   | 122.17 | -5.1 |
| <b>L-21</b> | Propanoic acid, 2-methyl-, 3-methylbutyl ester        | 519786  | 158.24 | -4.2 |
| <b>L-22</b> | (Z)-3,7-Dimethyl-2,7-octadien-1-ol, propanoate(ester) | 5365067 | 210.31 | -4.6 |
| <b>L-23</b> | 2-Ethyl-1-hexanol, pentafluoropropionate              | 545245  | 276.24 | -5.3 |
| <b>L-24</b> | Butanoic acid, 3-methyl-, butyl ester                 | 7981    | 158.24 | -5.0 |
| <b>L-25</b> | Butyl 2-methylbutanoate                               | 61812   | 158.24 | -4.2 |
| <b>L-26</b> | Propanoic acid, 2-methyl-, 3-methylbutyl ester        | 519786  | 158.24 | -4.2 |
| <b>L-27</b> | Propanoic acid, 2-methyl-, pentyl ester               | 75554   | 158.24 | -4.1 |
| <b>L-28</b> | Phenol, 2-methyl-                                     | 335     | 108.14 | -5.9 |
| <b>L-29</b> | 2,5-Dihydroxybenzaldehyde, 2TMS derivative            | 622536  | 282.48 | -2.6 |
| <b>L-30</b> | Pentanoic acid, pentyl ester                          | 62433   | 172.26 | -5.3 |
| <b>L-31</b> | Phenylethyl Alcohol                                   | 6054    | 122.16 | -6.0 |
| <b>L-32</b> | Fluoren-9-ol, 3,6-dimethoxy-9-(2-phenylethynyl)-      | 631096  | 342.4  | -7.1 |
| <b>L-33</b> | Pyrazine, 3,5-diethyl-2-methyl-                       | 28906   | 150.22 | -5.2 |

|             |                                                                |           |         |      |
|-------------|----------------------------------------------------------------|-----------|---------|------|
| <b>L-34</b> | 1-Methoxy-2-methyl-4-(methylthio)benzene                       | 592820    | 168.26  | -4.3 |
| <b>L-35</b> | Octanoic acid                                                  | 379       | 144.21  | -5.0 |
| <b>L-36</b> | Neophytadiene                                                  | 10446     | 278.5   | -4.2 |
| <b>L-37</b> | Naphthalene                                                    | 931       | 128.169 | -6.2 |
| <b>L-38</b> | Octane, 2-bromo-                                               | 79046     | 193.12  | -4.2 |
| <b>L-39</b> | Pentasulfide, dimethyl                                         | 81772     | 190.4   | -2.4 |
| <b>L-40</b> | Benzothiazole                                                  | 7222      | 135.19  | -4.6 |
| <b>L-41</b> | Methylcyclohexylacetate                                        | 139743    | 156.22  | -6.3 |
| <b>L-42</b> | 16-Methyl-heptadecane-1,2-diol, trimethylsilyl ether           | 91742675  | 430.9   | -2.7 |
| <b>L-43</b> | Nonanoic acid                                                  | 8158      | 158.24  | -4.3 |
| <b>L-44</b> | Docosanoic acid, docosyl ester                                 | 87221     | 649.2   | -3.5 |
| <b>L-45</b> | 16-Methyl-heptadecane-1,2-diol, trimethylsilyl ether           | 91742675  | 430.9   | -2.5 |
| <b>L-46</b> | 2e)-2-(Hydroxyimino)-3-Phenylpropanoic Acid-                   | 6399465   | 179.17  | -5.4 |
| <b>L-47</b> | 2,4,5,6,8-Pentathianonane                                      | 10420954  | 218.5   | -2.7 |
| <b>L-48</b> | Cetene                                                         | 12395     | 224.42  | -3.7 |
| <b>L-49</b> | Tetradecane                                                    | 12389     | 198.39  | -4.1 |
| <b>L-50</b> | Dodecanal                                                      | 8194      | 184.32  | -3.9 |
| <b>L-51</b> | 3,9-Dimethyl-4,8-diaza-3,8-undecadiene-2,10-dione dioxime      | 135472033 | 240.3   | -5.8 |
| <b>L-52</b> | 2,6,10,14-Tetramethyl-7-(3-methylpent-4-enylidene) pentadecane | 91694785  | 348.6   | -4.5 |
| <b>L-53</b> | Benzeneacetic acid, 2-methylpropyl ester                       | 60998     | 192.25  | -5.4 |
| <b>L-54</b> | Hexanoic acid, 2-phenylethyl ester                             | 61384     | 220.31  | -5.1 |
| <b>L-55</b> | 2,5-Cyclohexadiene-1,4-dione, 2,6-bis(1,1-dimethylethyl)-      | 12867     | 220.31  | -5.2 |
| <b>L-56</b> | 1-Tetradecene                                                  | 14260     | 196.37  | -4.1 |

|             |                                                                 |          |        |      |
|-------------|-----------------------------------------------------------------|----------|--------|------|
| <b>L-57</b> | Dimethyl trisulfide                                             | 19310    | 126.3  | -2.3 |
| <b>L-58</b> | 2H-Indol-2-one, 1,3-dihydro-                                    | 321710   | 133.15 | -6.4 |
| <b>L-59</b> | Pentadecane                                                     | 12391    | 212.41 | -4.0 |
| <b>L-60</b> | Phenol, 3,5-bis(1,1-dimethylethyl)-                             | 70825    | 206.32 | -5.6 |
| <b>L-61</b> | N1,N1,N4-Tris(tert-butyl dimethylsilyl)succinamide              | 91744783 | 458.9  | -3.0 |
| <b>L-62</b> | Hexathiane                                                      | 139602   | 192.4  | -2.3 |
| <b>L-63</b> | Octadecane, 1-bromo-                                            | 8218     | 333.4  | -3.8 |
| <b>L-64</b> | 1,3,3-Trimethyl-2-(2-methyl-cyclopropyl)-cyclohexene            | 595941   | 178.31 | -5.5 |
| <b>L-65</b> | Heptadecane                                                     | 12398    | 240.5  | -3.9 |
| <b>L-66</b> | Decanoic acid, decyl ester                                      | 74247    | 312.5  | -4.9 |
| <b>L-67</b> | 1,4-Methanobenzocyclodecene, 1,2,3,4,4a,5,8,9,12,12a-decahydro- | 556414   | 202.33 | -5.6 |
| <b>L-68</b> | Oxalic acid, cyclohexylmethyl tridecyl ester                    | 6421725  | 368.5  | -5.0 |
| <b>L-69</b> | ethanol, 2-(dodecylsulfinyl)-                                   | 88528    | 262.45 | -4.4 |
| <b>L-70</b> | 2,4-Di-tert-butylthiophenol                                     | 519681   | 222.39 | -5.1 |
| <b>L-71</b> | Ethanol, 2-(tetradecyloxy)-                                     | 16491    | 258.44 | -4.4 |
| <b>L-72</b> | Hexathiepane                                                    | 87012    | 206.4  | -2.6 |
| <b>L-73</b> | 2-Dodecen-1-yl(-)succinic anhydride                             | 5362708  | 266.38 | -4.8 |
| <b>L-74</b> | 3,5-di-tert-Butyl-4-hydroxyacetophenone                         | 616296   | 248.36 | -5.5 |
| <b>L-75</b> | 2,6-Bis(1,1-dimethylethyl)-4-(1-oxopropyl)phenol                | 616172   | 262.4  | -5.2 |
| <b>L-76</b> | 7,9-Di-tert-butyl-1-oxaspiro(4,5)deca-6,9-diene-2,8-dione       | 545303   | 276.4  | -5.9 |
| <b>L-77</b> | Dibutyl phthalate                                               | 3026     | 278.34 | -5.8 |

**Table S3: Protein-ligand interactions of top eight hit molecules with their binding residues.**

| L/N  | Volatile Compounds | 2D Diagram (PDB ID: 5b7n )                                                                                                                                                                                                                                                     | Hydrogen bond Amino Acids Residues | Hydrophobic Amino Acid Residues                                  |
|------|--------------------|--------------------------------------------------------------------------------------------------------------------------------------------------------------------------------------------------------------------------------------------------------------------------------|------------------------------------|------------------------------------------------------------------|
| L-32 |                    | 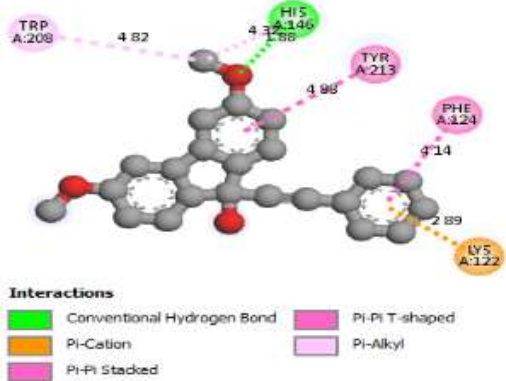 <p><b>Interactions</b></p> <ul style="list-style-type: none"> <li>Conventional Hydrogen Bond</li> <li>Pi-Cation</li> <li>Pi-Pi Stacked</li> <li>Pi-Pi T-shaped</li> <li>Pi-Alkyl</li> </ul> | HIS-146(1.88)                      | TRP-208(4.82)<br>TYR-213(4.88)<br>PHE-124(4.14)<br>LYS-122(2.89) |
| L-8  |                    |  <p><b>Interactions</b></p> <ul style="list-style-type: none"> <li>Attractive Charge</li> <li>Conventional Hydrogen Bond</li> <li>Pi-Sulfur</li> <li>Pi-Pi Stacked</li> </ul>               | THR-104(3.28)                      | MET-220(5.04)<br>GLU-40(4.19)<br>GLU-221(4.09)<br>TRP-199(5.17)  |

|      |  |                                                                                                                                                                                                    |                                |                                                                                                                 |
|------|--|----------------------------------------------------------------------------------------------------------------------------------------------------------------------------------------------------|--------------------------------|-----------------------------------------------------------------------------------------------------------------|
|      |  |                                                                                                                                                                                                    |                                |                                                                                                                 |
| L-58 |  | <p><b>Interactions</b></p> <ul style="list-style-type: none"> <li>van der Waals</li> <li>Conventional Hydrogen Bond</li> <li>Pi-Sulfur</li> <li>Pi-Pi Stacked</li> <li>Amide-Pi Stacked</li> </ul> | THR-104(1.85)                  | MET-220(5.96)                                                                                                   |
| L-41 |  | <p><b>Interactions</b></p> <ul style="list-style-type: none"> <li>Conventional Hydrogen Bond</li> <li>Carbon Hydrogen Bond</li> <li>Pi-Sigma</li> <li>Alkyl</li> </ul>                             | SER-243(2.74)<br>ASN-244(2.11) | VAL-78(5.21)<br>ALA-36(5.38)<br>GLU-218(3.72)<br>TRP-199(3.75)<br>MET-37(4.95)<br>MET-27(4.95)<br>MET-220(4.95) |

|      |  |                                                                                                                                                                                                                                                                                           |                                              |                                                                              |
|------|--|-------------------------------------------------------------------------------------------------------------------------------------------------------------------------------------------------------------------------------------------------------------------------------------------|----------------------------------------------|------------------------------------------------------------------------------|
| L-37 |  | 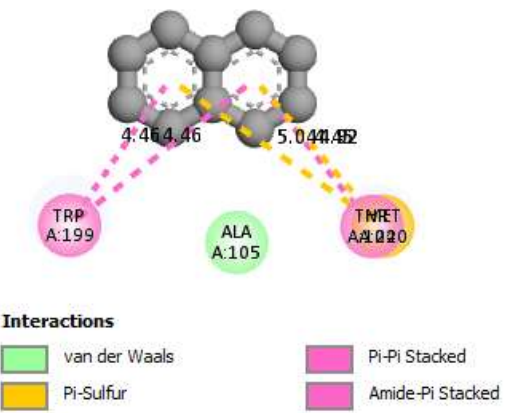 <p><b>Interactions</b></p> <ul style="list-style-type: none"> <li>van der Waals</li> <li>Pi-Sulfur</li> <li>Pi-Pi Stacked</li> <li>Amide-Pi Stacked</li> </ul>                                          | Absent                                       | TRP-199 (4.45)                                                               |
| L-17 |  |  <p><b>Interactions</b></p> <ul style="list-style-type: none"> <li>Conventional Hydrogen Bond</li> <li>Carbon Hydrogen Bond</li> <li>Pi-Donor Hydrogen Bond</li> <li>Alkyl</li> <li>Pi-Alkyl</li> </ul> | SER-28(2.55)<br>VAL-71(2.20)<br>GLY-64(2.45) | GLN-63(2.85)<br>PRO-70(5.28)<br>PRO-30(5.37)<br>PRO-30(5.37)<br>ALA-29(3.80) |
| L-31 |  |  <p><b>Interactions</b></p> <ul style="list-style-type: none"> <li>Conventional Hydrogen Bond</li> <li>Unfavorable Donor-Donor</li> <li>Pi-Sulfur</li> <li>Pi-Pi Stacked</li> </ul>                    | ARG-240(2.50)                                | MET-220(1.39)<br>MET-220(5.05)<br>TRP-199(5.05)<br>ARG-240(2.50)             |





**Figure S1:** GC-MS chromatogram of volatile compounds produced by *Klebsiella pneumoniae*.
